# Supplementary material for: Modulation of Rab7a-mediated growth factor receptor trafficking inhibits islet beta cell apoptosis and autophagy under conditions of metabolic stress
Source: PubMed Central journal article supplement (PMC7519639; doi:10.1038/s41598-020-72939-y), 2020-09-25
Supplement: 41598_2020_72939_MOESM1_ESM.pdf [file 41598_2020_72939_MOESM1_ESM.pdf]

**Modulation of Rab7a-mediated growth factor receptor trafficking inhibits islet beta cell apoptosis and autophagy under conditions of metabolic stress.**

Nirun V Hewawasam<sup>1¶</sup>, Fadel Lhaf<sup>1¶</sup>, Henry A Taylor<sup>1</sup>, Katrina Vilorio<sup>1</sup>, Amazon Austin<sup>2</sup>, Aileen King<sup>2</sup>, Peter Jones<sup>2</sup>, Lucy Jones<sup>1</sup>, Mark D Turner<sup>3</sup> and Natasha J Hill<sup>1\*</sup>

## Supplementary Figure 1.

a.

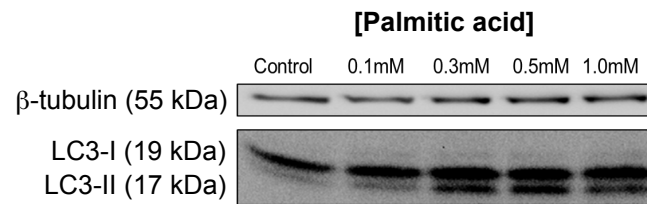

b.

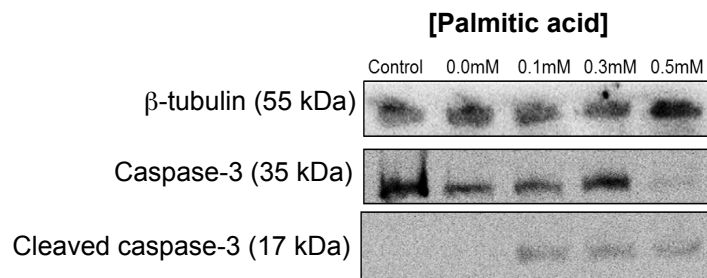

**Supplementary Figure 1: Palmitic acid induces activation of both autophagy and apoptosis pathways.** INS-1 cells were seeded at  $1 \times 10^5$  cells/ml in 24 well plates in standard 10% FBS medium and allowed to adhere overnight before treatment with the indicated concentration of palmitic acid. Lysates were then analysed by western blot using antibodies to the autophagy marker LC3-I/II (a) and the apoptosis marker Caspase-3 (b). The active cleaved form of Caspase-3 was only detected following treatment with at least 0.1mM palmitic acid.

## Supplementary Figure 2.

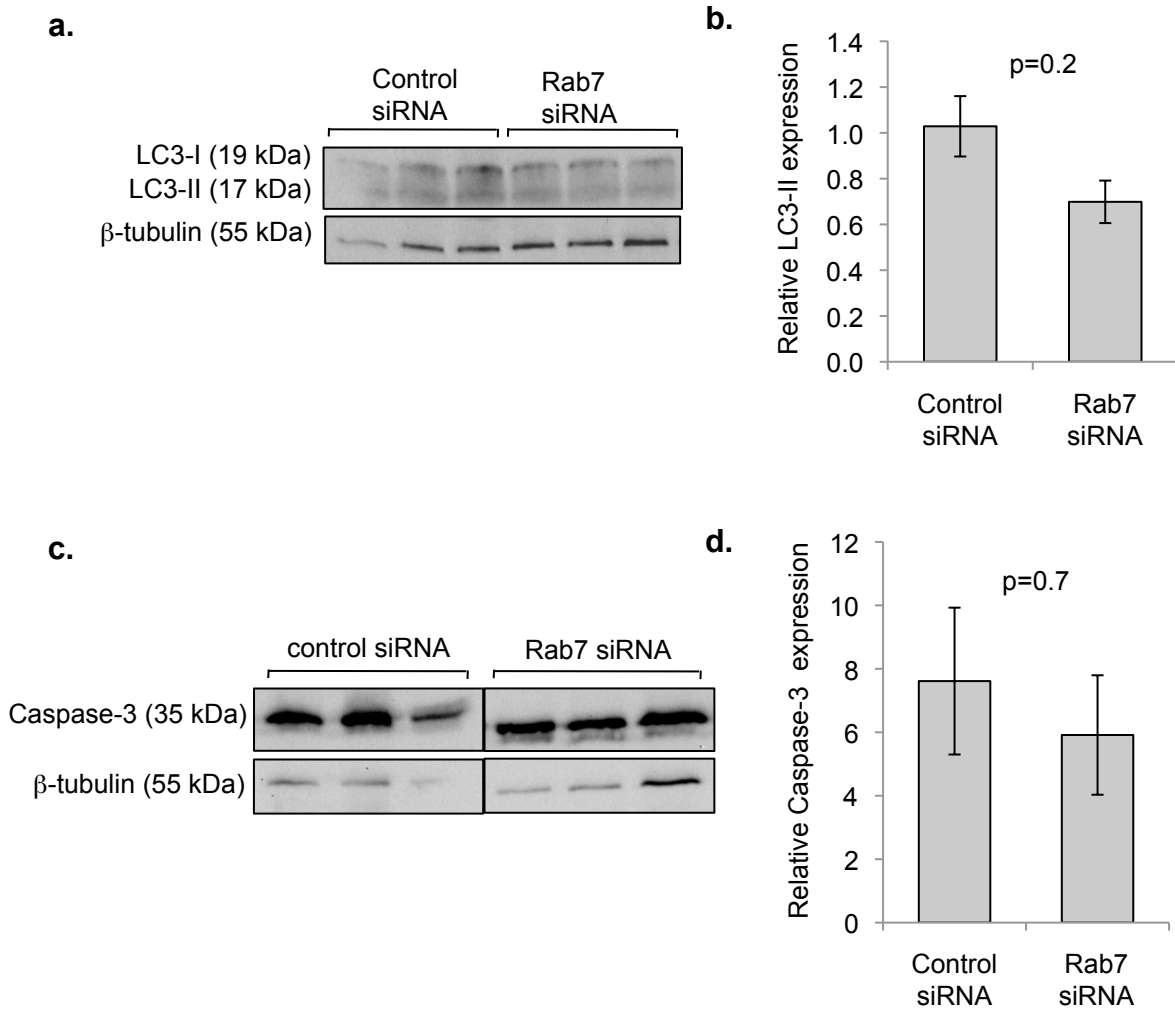

**Supplementary Figure 2: Rab7 siRNA knockdown does not affect expression of autophagy and apoptosis markers in unstressed conditions.** INS-1 cells were seeded at  $1 \times 10^5$  cells/ml in 24 well plates and transfected with control- or Rab7a-siRNA for 72 hours in standard 10% FBS medium, before preparing lysates for western blot using antibodies to the autophagy marker LC3 (a&b) and the apoptosis marker Caspase-3 (c&d). No cleaved caspase-3 was observed in the absence of palmitic acid. Graphs in B&D shown mean relative expression standardised to  $\beta$  tubulin,  $\pm$  SEM, from 3 independent experiments.

**Uncropped blots, Hewawasam et al.**

Figure 1

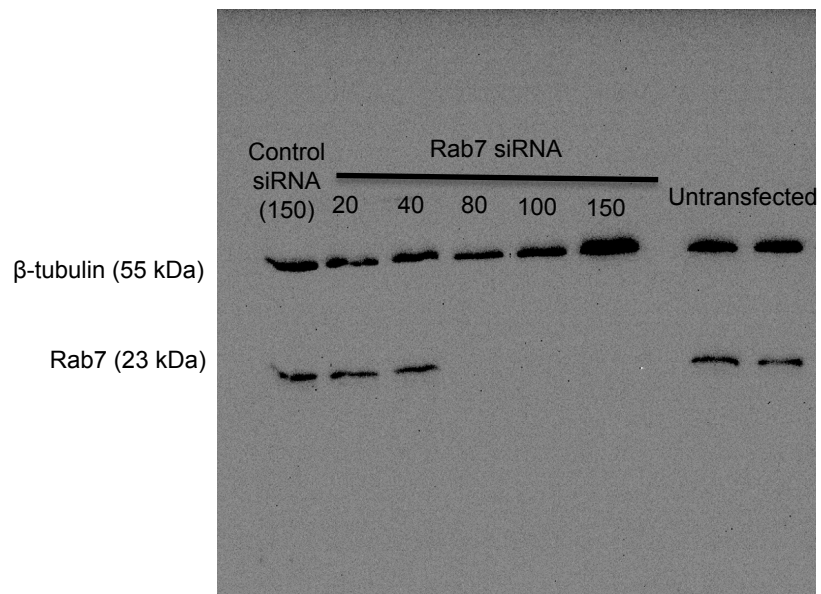

Figure 2

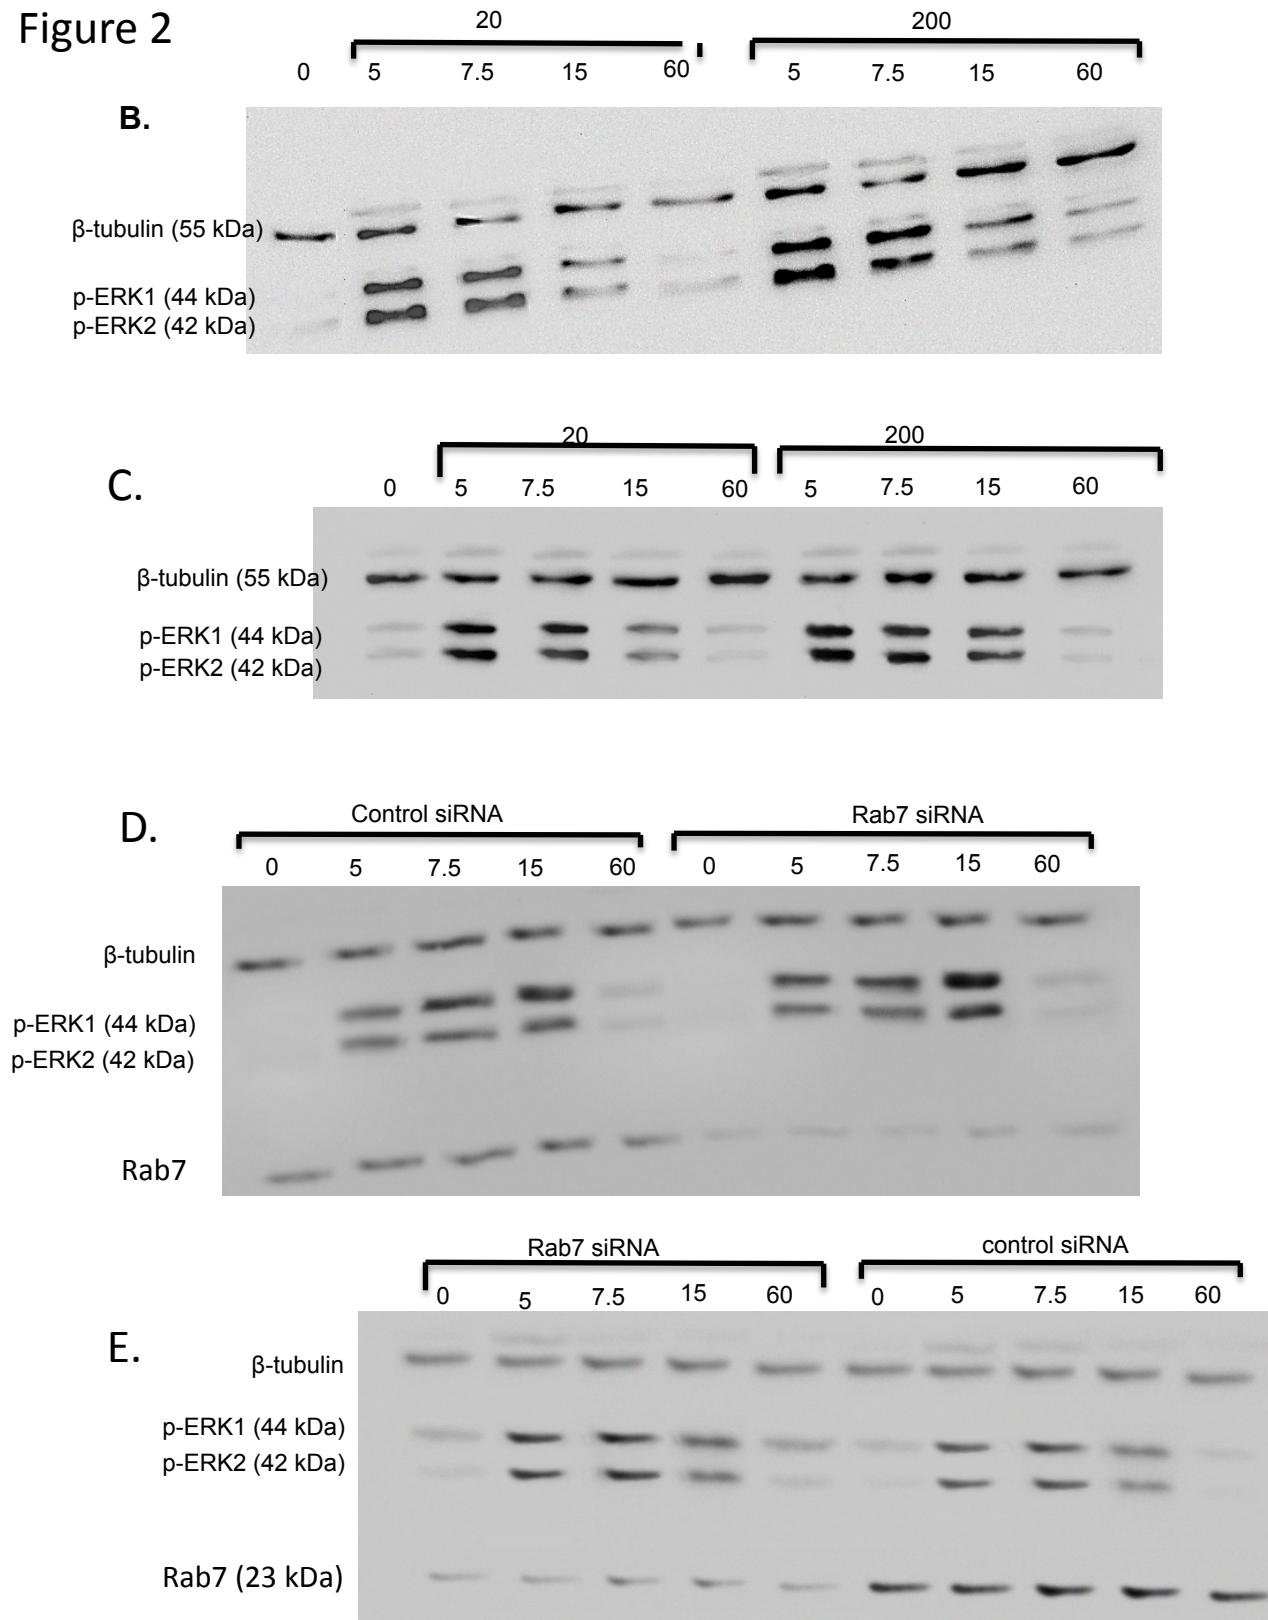

Figure 3

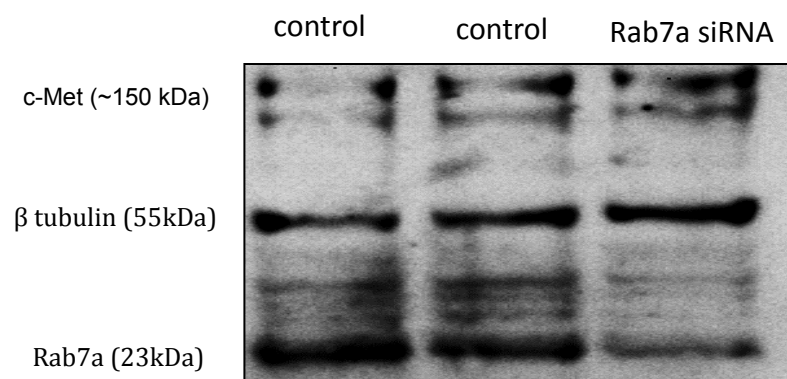

Figure 4

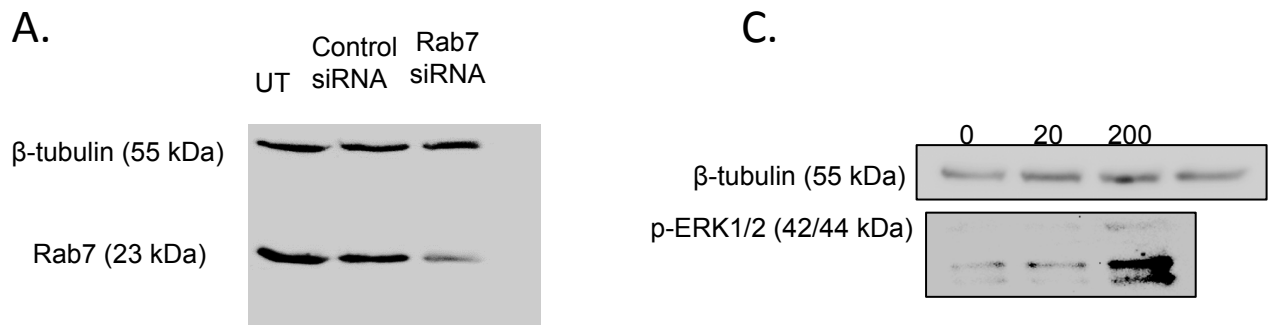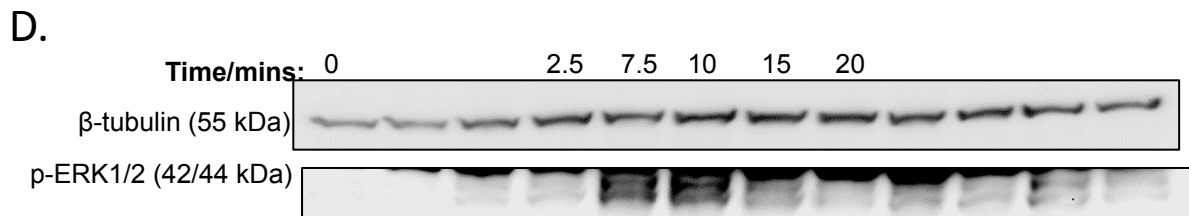

*Fully uncropped blots for validation data in (C&D) to determine optimum concentration and time of stimulation could not be located.*

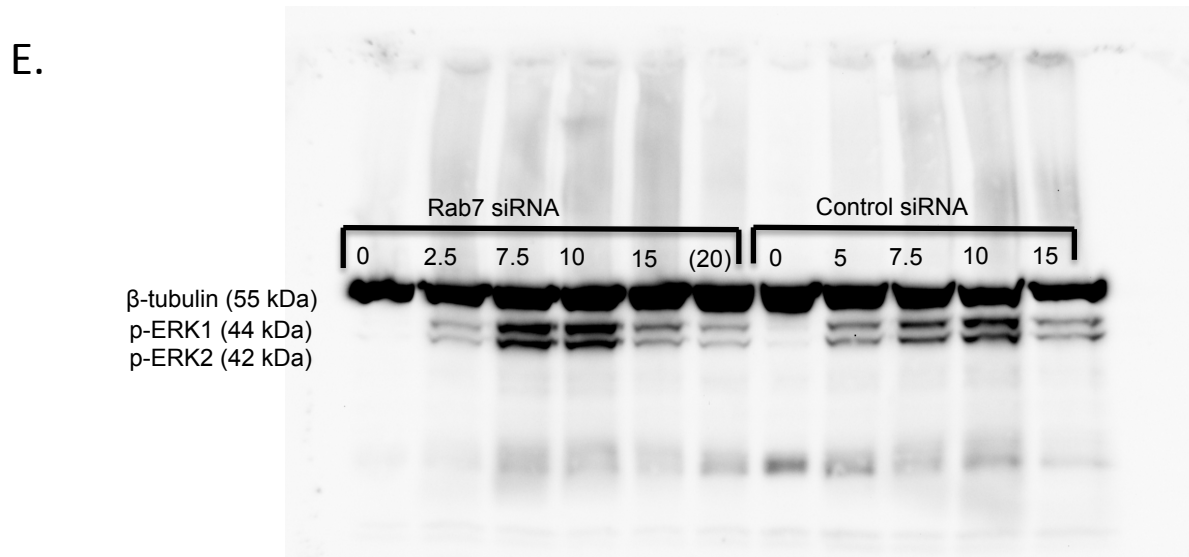

Uncropped blot for  $\beta$ -tubulin at the exposure used in the main figures is shown below (fully uncropped blot at this exposure level not available)

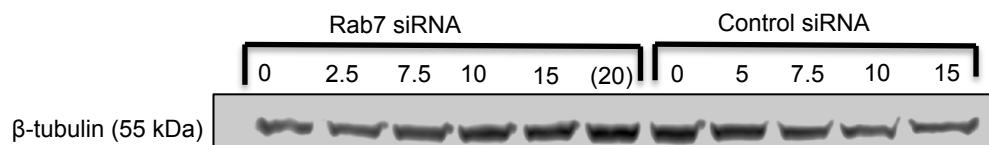

NB The lanes in (E) have been re-ordered in the final figure for consistency.



Figure 6

C.

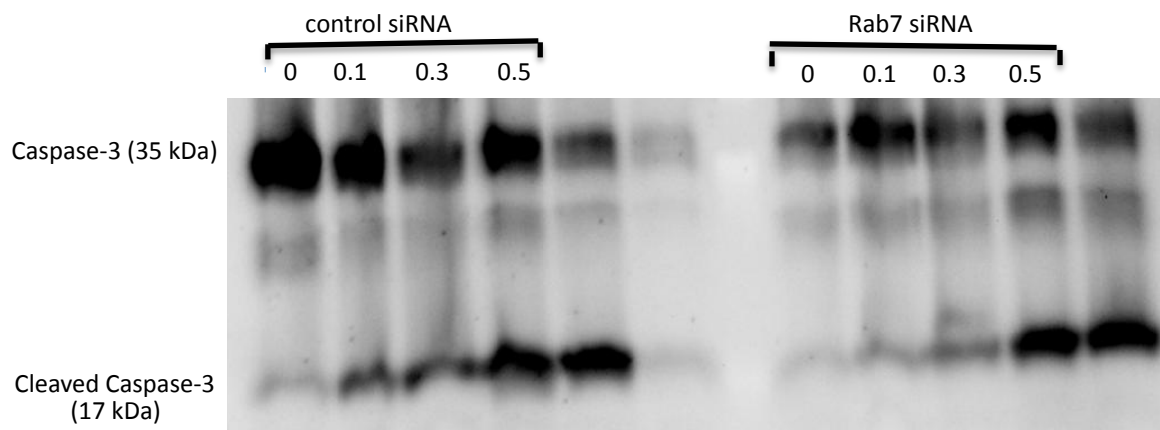

*Fully uncropped image showing tubulin bands could not be located.*

E.

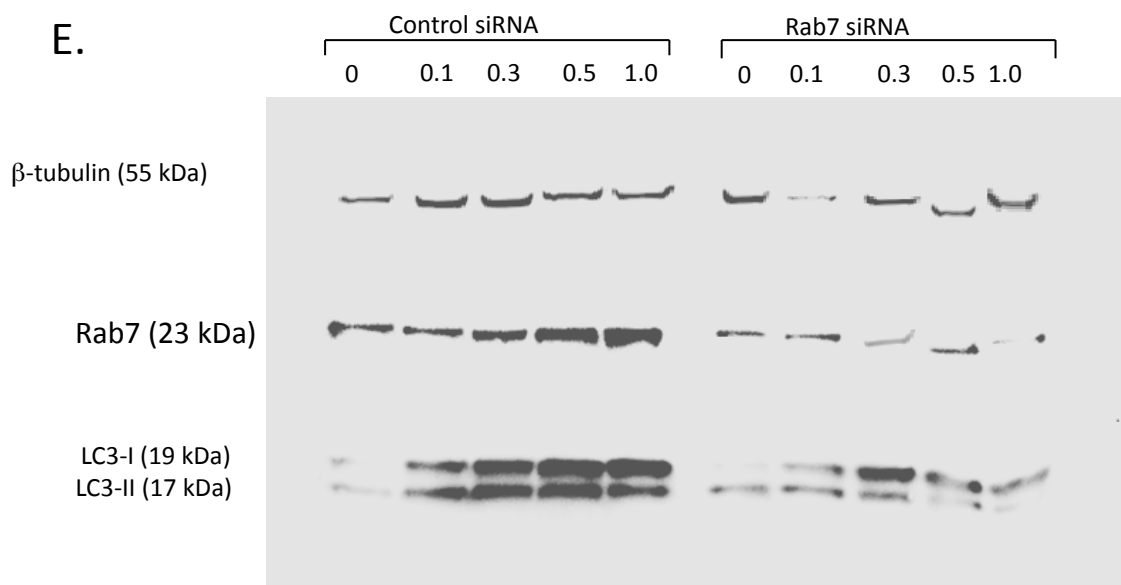

# Supplementary Figure 1

**a.**

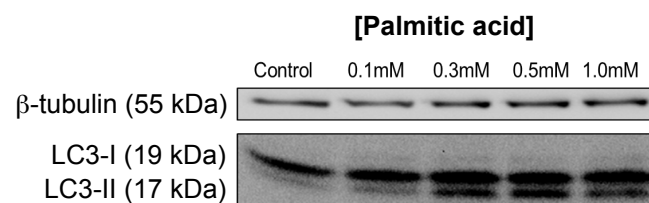

**b.**

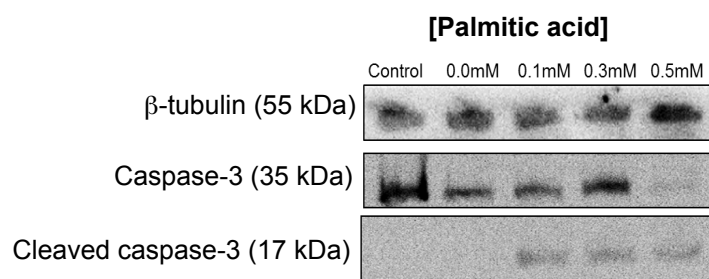

*We regret that uncropped blots could not be located for this figure.*

## Supplementary Figure 2

**A.**

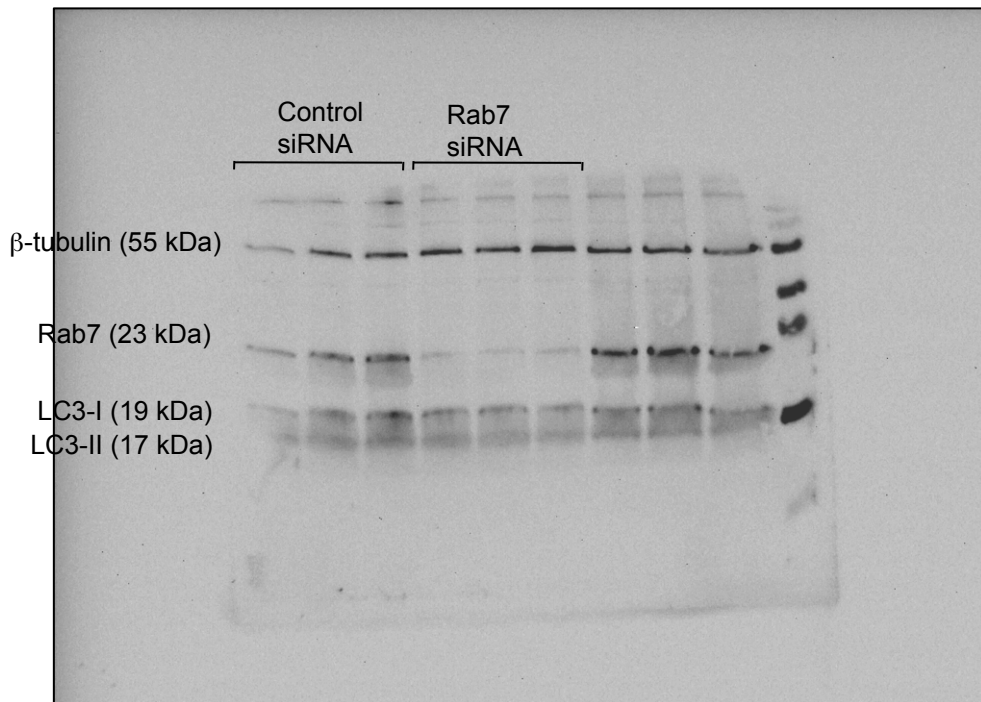

**C.**

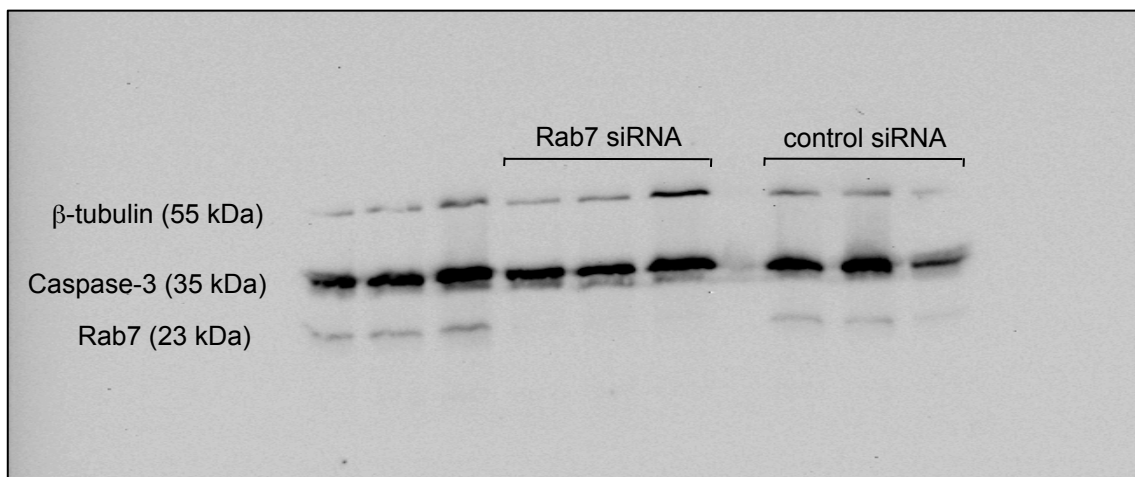

NB The lanes have been re-ordered in the final figure for consistency.
